1 **Electrostatics cause the molecular chaperone BiP to preferentially bind oligomerized states of a client**  
2 **protein**

3 Judy L.M. Kotler, Wei-Shao Wei, Erin E. Deans, Timothy O. Street

4 Department of Biochemistry, Brandeis University, Waltham, Massachusetts 02454

5

6 **Abstract**

7 Hsp70-family chaperones bind short monomeric peptides with a weak characteristic affinity in the low  
8 micromolar range, but can also bind some aggregates, fibrils, and amyloids, with low nanomolar affinity.  
9 While this differential affinity enables Hsp70 to preferentially target potentially toxic aggregates, it is  
10 unknown how Hsp70s differentiate between monomeric and oligomeric states of a target protein. Here  
11 we examine the interaction of BiP (the Hsp70 paralog in the endoplasmic reticulum) with proIGF2, the  
12 pro-protein form of IGF2 that includes a long and mostly disordered E-peptide region that promotes  
13 proIGF2 oligomerization. We discover that electrostatic attraction enables the negatively charged BiP to  
14 bind positively charged E-peptide oligomers with low nanomolar affinity. We identify the specific BiP  
15 binding sites on proIGF2, and although some are positively charged, as monomers they bind BiP with  
16 characteristically low affinity in the micromolar range. We conclude that electrostatics enable BiP to  
17 preferentially recognize oligomeric states of proIGF2. Electrostatic targeting of Hsp70 to aggregates  
18 may be broadly applicable, as all the currently-documented cases in which Hsp70 binds aggregates with  
19 high-affinity involve clients that are expected to be positively charged.

20 **Introduction**

21 Hsp70-family chaperones are crucial molecular machines involved in folding nascent polypeptides,  
22 holding non-native state protein folding intermediates, and disaggregating misfolded proteins<sup>1,2</sup>. They  
23 bind exposed, extended, and hydrophobic segments of unfolded, misfolded, or partially-folded  
24 proteins<sup>3,4</sup>. Hsp70s are composed of two domains held together by an interdomain linker: a nucleotide-  
25 binding domain (NBD) and substrate-binding domain (SBD) (Figure 1A). The SBD contains a beta-sheet  
26 region (SBD<sub>β</sub>), including the hydrophobic substrate-binding cleft, and an alpha helical lid (SBD<sub>α</sub>). Hsp70s  
27 populate two major conformations that are dictated by the nucleotide bound in the NBD. In the ATP-  
28 bound conformation, the NBD and SBD<sub>β</sub> are docked, the linker is bound to the NBD, and the SBD<sub>α</sub> lid is  
29 open to expose the SBD<sub>β</sub> substrate-binding cleft<sup>5</sup>. After ATP is hydrolyzed, the NBD and SBD<sub>β</sub> undock,  
30 and the SBD<sub>α</sub> lid closes onto the SBD<sub>β</sub> substrate-binding cleft<sup>6</sup>. The ADP-bound conformation typically  
31 favors client binding, in which a client can be trapped between the SBD<sub>β</sub> substrate-binding cleft and  
32 SBD<sub>α</sub> lid<sup>5</sup>. BiP, like other Hsp70s, is negatively charged, much of which is contributed by the SBD (Figure  
33 1A).

34 A range of neurodegenerative diseases are associated with the formation of protein aggregates and  
35 fibrils, and it is important to understand how Hsp70-type chaperones differentiate whether the “client”  
36 protein is in an oligomeric or monomeric state. In some cases Hsp70s bind clients with much higher  
37 affinity when the client is oligomeric. For example, human Hsp70 binds tau fibrils with low nanomolar  
38 affinity and tau monomers with micromolar affinity<sup>7</sup>. In contrast, human Hsp70 binds  $\alpha$ -synuclein fibrils  
39 and monomers with comparable low micromolar affinities<sup>8</sup>. It is unknown how Hsp70 achieves high

40 affinity for oligomeric client states, and why this affinity enhancement is observed for some but not all  
41 oligomeric clients.

42 ProIGF2 is the pro-protein of insulin-like growth factor (IGF) 2, which is a member of the insulin family of  
43 hormones, and is a mitogen for fetal and placental cell growth<sup>9</sup>. ProIGF2 is targeted to the ER via an N-  
44 terminal (24 residue) ER-signaling sequence that is cleaved upon entrance to the ER. Following the  
45 signal sequence is the 67 residue mature hormone region and 89 residue positively-charged E-peptide  
46 (Figure 1B). Folded,  $\alpha$ -helical mature IGF2 contains three disulfide bonds, whereas the E-peptide is  
47 predicted to be mostly disordered and has minimal secondary structure<sup>10</sup>. Once folded, proIGF2 is  
48 translocated from the ER to the Golgi for further processing<sup>11</sup>. ProIGF2 is modified by N-  
49 acetylgalactosamine likely in the *cis*-Golgi, and sialic acid addition and oligosaccharide maturation in the  
50 *trans*-Golgi<sup>11</sup>. Modified proIGF2 is proteolytically cleaved twice by the proprotein convertase PC4: first  
51 to the intermediate form (residues 25-126) and then to mature IGF2 (25-91) (Figure 1B)<sup>12,13</sup>. The second  
52 cleavage liberates the hormone preptin (93-126)<sup>14</sup>. Preptin, which has minimal structure<sup>15</sup>, is cosecreted  
53 with insulin and amylin and increases glucose-mediated insulin secretion from pancreatic  $\beta$ -cells<sup>16</sup>. An  
54 intermediate cleavage product (25-111) has also been observed in bovine serum<sup>17</sup>. The positively-  
55 charged cleavage motifs confer a net charge of +9 to the E-peptide, while mature IGF2 has a net charge  
56 of -1.

57 Previous work demonstrated that proIGF2 forms dynamic oligomers, where the E-peptide region is  
58 necessary for oligomerization<sup>10</sup>. BiP and the ER Hsp90 paralog Grp94 regulate the assembly of these  
59 oligomers while exerting only a minimal influence on the folding of proIGF2<sup>10</sup>. It was left unknown  
60 where and how BiP and Grp94 interact with proIGF2. For example, whether BiP and Grp94 compete for  
61 binding sites on proIGF2 or whether they recognize different areas, and how tightly these chaperones  
62 interact with proIGF2 oligomers. Here, by dissecting the mechanism by which BiP recognizes proIGF2  
63 oligomers, we discover that electrostatics play a defining role. Given the available data in the literature,  
64 electrostatics provide a plausible explanation of why Hsp70 chaperones preferentially bind some  
65 aggregated clients, such as tau, but not other clients such as  $\alpha$ -synuclein.

66

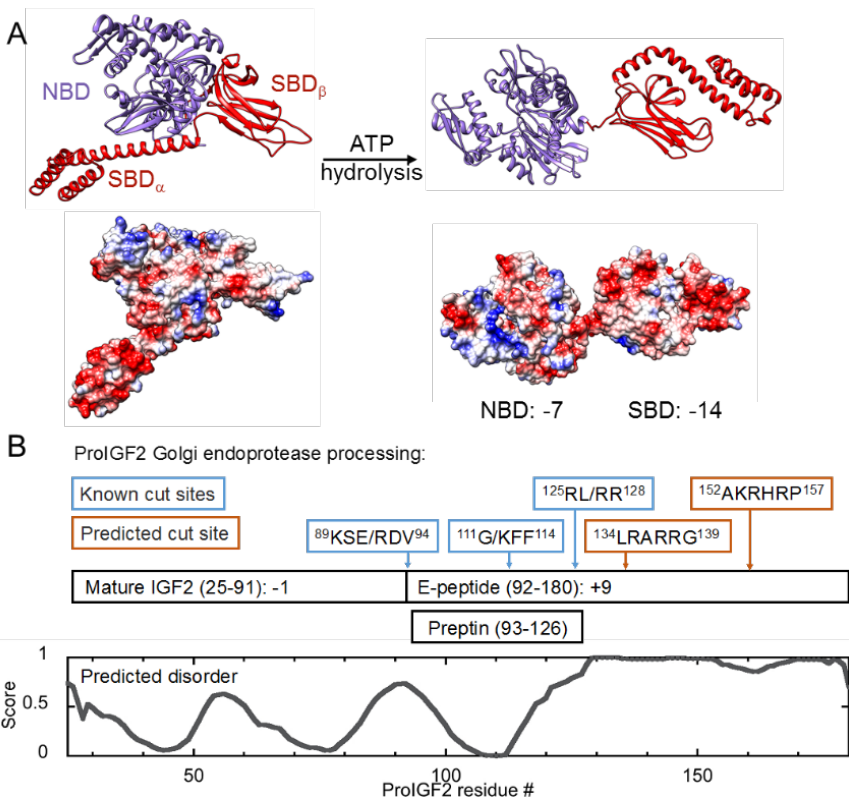

67

68 **Figure 1. Overview of BiP and proIGF2.** (A) BiP's two major conformations are shown in ribbon and  
 69 surface, with calculated electrostatic potential coloring (red for negative charge and blue for positive  
 70 charge)<sup>18</sup>. BiP's ATP-bound conformation has NBD and SBD docked (PDB:5E84), while BiP's ADP-bound  
 71 conformation has domains undocked (BiP homology model, PDB:2KHO)<sup>5,6</sup>. The net charges of the NBD  
 72 and SBD are noted below the ADP conformation. (B) Known and predicted endoprotease processing  
 73 sites on proIGF2. "/" indicates known cut site within sequence. Predicted sites are based on furin  
 74 protease motif, "xBxBB/x", where x is an uncharged and B is a basic (Arg or Lys) amino acid<sup>19</sup>. Amino  
 75 acid sequences shown in boxes are from *Mus musculus* proIGF2. Disorder for proIGF2 amino acid  
 76 sequence was predicted by PONDR<sup>20</sup>.

77

## 78 Results

### 79 BiP binds E-peptide oligomers with high affinity

80 We first utilized dynamic light scattering (DLS) to quantify the size of proIGF2 and E-peptide oligomers  
 81 and the range of conditions in which oligomers are formed. ProIGF2 oligomers are larger than E-peptide  
 82 oligomers and in both cases their size increases with protein concentration (Supplemental Figure 1A). In  
 83 these experiments proIGF2 was maintained in a reduced and non-native state by the reducing agent  
 84 TCEP. We evaluated proIGF2 concentrations at 1 $\mu$ M and below, because at higher concentrations  
 85 proIGF2 forms large particles that produce optical light scattering (Supplemental Figure 1B), which  
 86 prevents accurate size determination by DLS. E-peptide oligomers and mature IGF2 do not scatter light  
 87 at concentrations up to 5 $\mu$ M (Supplemental Figure 1B). For proIGF2, the build-up of light-scattering

88 particles is slower at pH 6 versus at pH 7.5 (Supplemental Figures 1C,D), so the first experiments were  
89 performed at this lower pH condition.

90 Because the hydrodynamic radius ( $R_H$ ) of proIGF2 and E-peptide oligomers are in the range of hundreds  
91 of nanometers (Supplemental Figure 1A), much larger than BiP ( $R_H \sim 3\text{nm}^{10}$ ), we reasoned that the  
92 binding of BiP to these oligomers could be measured by fluorescence depolarization (FP). Specifically, if  
93 BiP preferentially binds monomers or small oligomers then a negligible increase in polarization is  
94 expected, due to the small size of proIGF2 (17 kDa) relative to BiP (70 kDa), whereas if BiP preferentially  
95 binds large oligomers then a large change in polarization is anticipated (Figure 2A). Figure 2B shows that  
96 BiP binds both proIGF2 and E-peptide oligomers, whereas no FP change is observed for mature IGF2. BiP  
97 binding to proIGF2 and E-peptide oligomers is observed under both ATP (Figure 2B) and ADP  
98 (Supplemental Figure 2) conditions. The larger amplitude of FP change for proIGF2 versus E-peptide is  
99 consistent with the larger size of proIGF2 oligomers. In both cases the FP signal increases with protein  
100 concentration similar to the increasing size of E-peptide and proIGF2 oligomers as measured by DLS.  
101 BiP's SBD is responsible for the high-affinity binding of proIGF2 oligomers because the isolated BiP NBD  
102 has only weak interactions with proIGF2 (Supplemental Figure 2).



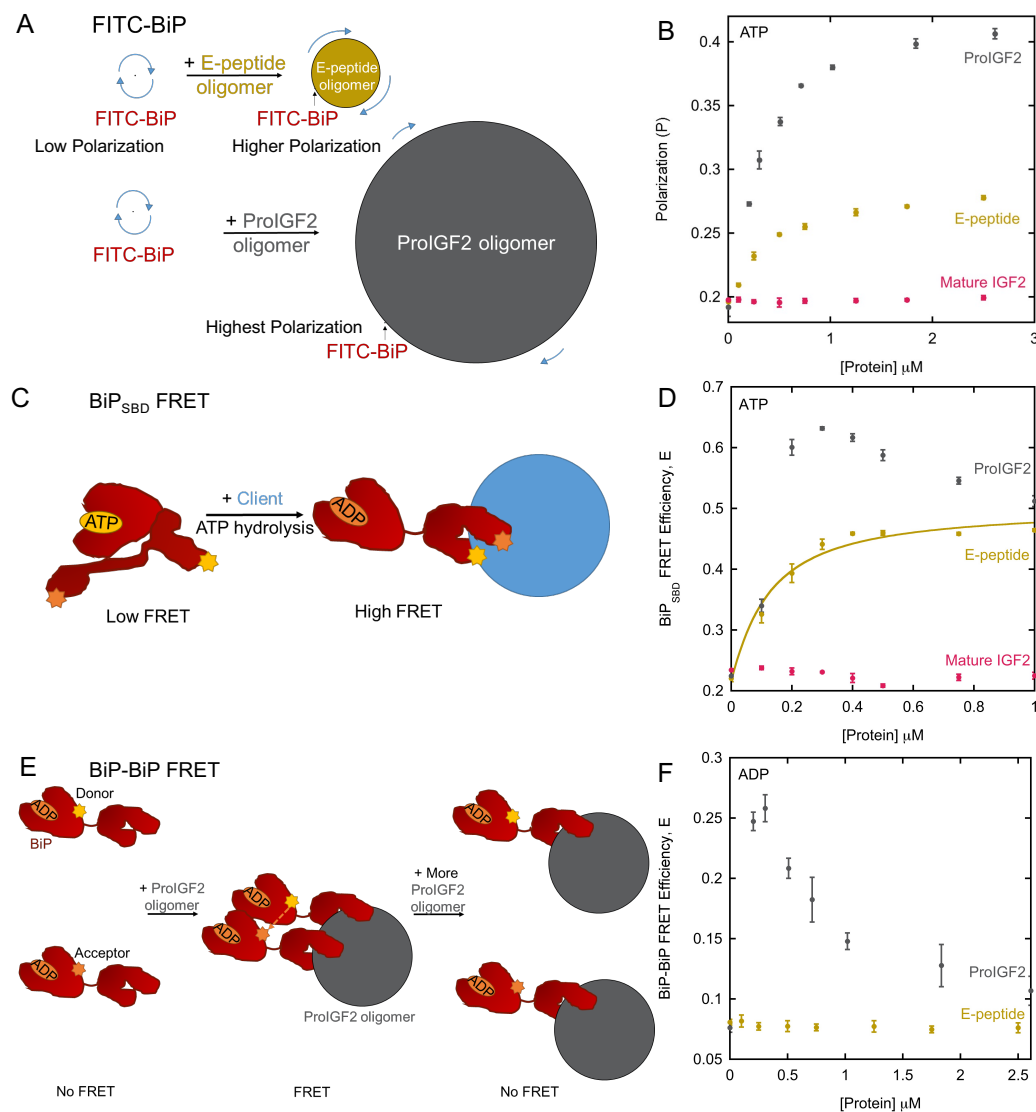

103

104 **Figure 2. BiP binds proIGF2 and E-peptide oligomers. (B)** Schematic of FITC-BiP fluorescence  
 105 depolarization assay. BiP, E-peptide oligomer, and proIGF2 oligomer relative sizes are shown at 1  $\mu\text{M}$ .  
 106 Blue arrows indicate relative tumbling rates where longer arrows indicate faster tumbling and shorter  
 107 arrows indicate slower tumbling. **(C)** FP assay with FITC-BiP and proIGF2, E-peptide, and mature IGF2  
 108 in the presence of ATP. **(D)** Schematic of BiP<sub>SBD</sub> FRET where BiP's lid-open, ATP conformation produces low  
 109 FRET efficiency (E) and BiP's lid-closed and client-bound, ADP-conformation produces high FRET  
 110 efficiency. Donor and acceptor labels can be present in both locations on the SBD due to labeling  
 111 protocol, but only one of each is shown for clarity. BiP and oligomer sizes are not to scale. **(E)** BiP<sub>SBD</sub>  
 112 FRET data for proIGF2, E-peptide and mature IGF2. Solid line is a fit to equation 4, with  $K_D = 0.098 \pm$   
 113  $0.010 \mu\text{M}$ . **(F)** Schematic of BiP-BiP FRET experiment with BiP separately-labeled with either donor or  
 114 acceptor fluorophore. BiP and oligomer sizes are not to scale. **(G)** BiP-BiP FRET data for proIGF2 and E-  
 115 peptide. Error bars are the SEM for three replicates.

116 The above FP assay cannot yield a binding affinity because the FP signal is determined by the oligomer  
 117 size, however, given that large FP changes are observed at sub-micromolar concentrations of proIGF2

118 and E-peptide, the FP data suggests sub-micromolar affinity. To determine BiP affinity for oligomers, we  
119 utilized a FRET assay measuring the conformation of BiP's SBD<sup>21,22</sup>. This BiP<sub>SBD</sub> FRET assay produces low  
120 FRET efficiency in the ATP-bound, lid-open state and high FRET efficiency in the ADP-bound and lid-  
121 closed state (Figure 2C). ProIGF2, E-peptide, and mature IGF2 were assayed with BiP<sub>SBD</sub> FRET in the  
122 presence of ATP (Figure 2D). BiP<sub>SBD</sub> FRET increases upon binding proIGF2 and the E-peptide oligomers,  
123 indicating lid closure, as is typically observed when an Hsp70 binds a peptide client<sup>21,23</sup>. No lid-closure is  
124 observed in the presence of mature IGF2. The FRET change for E-peptide can be fit with a binding curve  
125 (Figure 2D, solid line) yielding a binding affinity of approximately 100 nM, approximately 100-fold higher  
126 affinity than is typical for BiP binding a monomeric peptide under ATP conditions. While measuring BiP's  
127 conformation is an indirect determination of binding affinity, later we demonstrate that this indirect  
128 method agrees with BiP affinities measured directly for peptides using an FP assay.

129 The lid closure of BiP in the presence of E-peptide oligomers could result from stable binding while the  
130 BiP ATPase cycle is stalled in the ADP state, or from BiP cycling through rounds of ATP binding and  
131 hydrolysis with accelerated ATPase kinetics that shift the conformational equilibrium towards the lid  
132 closed state. ATPase measurements support the latter case, as the BiP ATPase rate increases from  $0.23$   
133  $\pm 0.01 \text{ min}^{-1}$  to  $1.53 \pm 0.02 \text{ min}^{-1}$  in the presence of  $2.5 \mu\text{M}$  E-peptide. Due to the enhanced hydrolysis of  
134 ATP by BiP, the measured affinity under ATP conditions will have a contribution from the ADP-bound  
135 state, and we sought to measure this contribution. However, measuring BiP affinity under ADP  
136 conditions is challenging because BiP is maintained uniformly in the high-FRET lid-closed state, so no  
137 change in FRET efficiency is observed (Supplemental Figure 3). Therefore, we utilize ADP conditions with  
138 trace quantities of ATP, to enable a change of FRET to be measured. For example, commercial stocks of  
139 ADP contain  $\sim 2\%$  ATP (see Figure 1 in Liu et al.<sup>24</sup>), which we remove by a pretreatment with hexokinase  
140 (HK, see Methods). In experiments with this residual ATP present (termed "ADP, no HK") or with an  
141 additional 5% added ATP, we can measure BiP affinity to E-peptide oligomers under predominantly ADP  
142 conditions. In both cases, the measured BiP affinity to E-peptide oligomers is in the range of 10-20 nM  
143 (Supplemental Figure 3). The roughly ten-fold higher affinity of BiP for E-peptide oligomers under ADP  
144 versus ATP conditions is similar to the nucleotide dependence observed for other Hsp70s binding  
145 peptides<sup>25,26</sup>.

146 Unlike the BiP<sub>SBD</sub> FRET data with E-peptide oligomers in Figure 2D, which can be fit to a binding curve,  
147 for proIGF2 oligomers the FRET efficiency first rises above 0.5 and then falls back to a saturating value  
148 close to that observed for the E-peptide. Due to the fluorophore labeling scheme (Methods) the  
149 maximum FRET efficiency is 0.5 for a BiP monomer. However, if BiP monomers are positioned closely on  
150 an oligomer then FRET efficiencies above 0.5 could arise from an additional contribution from FRET  
151 between BiPs. We developed a FRET assay to detect when BiPs are in close proximity ("BiP-BiP FRET",  
152 Figure 2E). Upon adding proIGF2, BiP-BiP FRET reaches a maximum at  $0.3 \mu\text{M}$  proIGF2, indicating  
153 multiple BiP's are occupying a single proIGF2 oligomer. Higher concentrations of proIGF2 decrease FRET  
154 (Figure 2F). At these higher concentrations of proIGF2 oligomers, with the same concentration of BiP,  
155 single BiPs will occupy different proIGF2 oligomers and FRET efficiency will decrease. Multiple BiPs  
156 binding per oligomer is not necessary for high affinity, however, because BiP-BiP FRET is not observed in  
157 experiments with E-peptide (Figure 2F).

158 Overall, we conclude that E-peptide oligomers are well-suited to uncover the origin of BiP's high affinity  
159 for oligomers. Unlike proIGF2, E-peptide oligomers are not confounded by BiP-BiP FRET, making the  
160 BiP<sub>SBD</sub> FRET assay a powerful tool for measuring BiP affinity to oligomers. Furthermore, whereas proIGF2

161 experiments are performed at low pH to limit the formation of very large oligomers that scatter light, E-  
162 peptide oligomers are well behaved at both low and high pH values (Supplemental Figure 1B) and BiP  
163 binds with comparable affinity at both pH 6.0 ( $K_D$  of  $98 \pm 10$  nM) and pH 7.5 ( $K_D$  of  $130 \pm 10$  nM) under  
164 ATP conditions.

165

### 166 Identification of BiP binding sites on proIGF2

167 BiP binding sites can be predicted from primary sequence<sup>27</sup> and three potential sites are on the E-  
168 peptide (Figure 3A, labeled 1, 2, and 3). Binding site 1 resides within the preptin region. We also  
169 evaluated BiP's interaction with the mature region of proIGF2. All E-peptide peptide constructs were  
170 labeled with FITC for FP measurements (Methods) and maintained at a low concentration (50 nM) in BiP  
171 binding experiments to suppress oligomerization. Indeed, in the absence of BiP sites 1-3 all have similar  
172 low polarization values of  $\sim 0.07$  (Supplemental Figures 4A-C) that are characteristic of monomeric  
173 peptides.

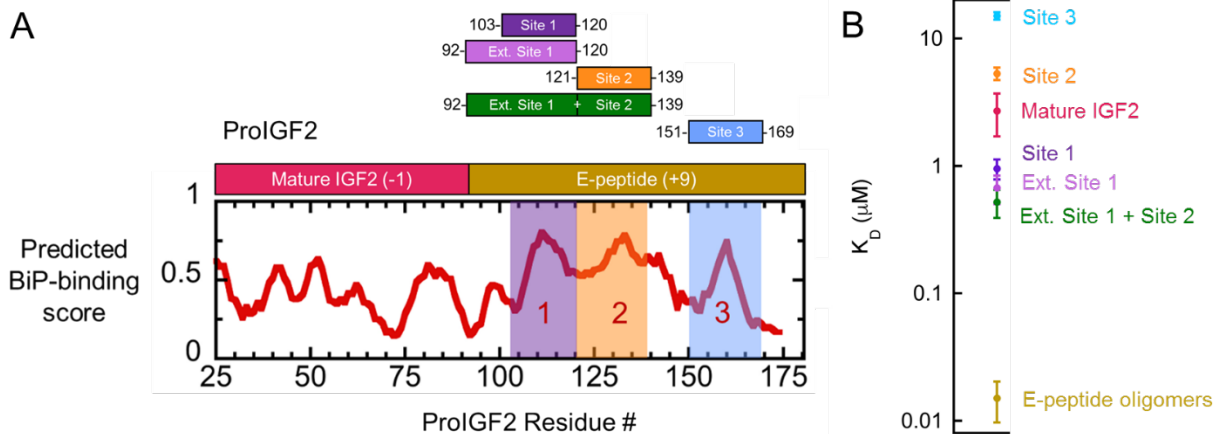

174

175 **Figure 3. (A)** BiP-binding sites (labeled 1, 2, and 3) as predicted by BiPPred<sup>27</sup>. Color shading indicates  
176 FITC-labeled peptide binding sites 1 (purple), 2 (orange), and 3 (blue). **(B)** Affinities of monomeric E-  
177 peptide fragments (from Supplemental Figure 4) and the oligomeric E-peptide (from Supplemental  
178 Figure 3). Measurements performed under ADP conditions. Error bars are the SEM for at least three  
179 binding curve replicates.

180 BiP binds all three binding-site peptides and mature IGF2 with low micromolar affinity, in the presence  
181 of ADP, and approximately 10-fold weaker affinity in the presence of ATP (Supplemental Figures 4A-D).  
182 Site 1 has the highest affinity for BiP ( $K_D \sim 1 \mu\text{M}$  under ADP conditions), a much weaker binding than is  
183 observed for E-peptide oligomers ( $K_D \sim 10\text{-}20$  nM). While this difference in affinity could plausibly be  
184 explained if site 1 is not a complete BiP binding site, we confirmed that site 1 is complete by  
185 constructing E-peptide fragments centered at site 1, that are extended in the N-terminal direction  
186 (residues 92-120) and in the C-terminal direction (residues 92-139). Both “extended fragments” and site  
187 1 bind BiP with similar affinity under ADP conditions (compare Supplemental Figures 4A, E, and F).  
188 Because the 92-139 fragment contains both site 1 and site 2, we can exclude the possibility that the high  
189 affinity of BiP to E-peptide oligomers is due to an avidity effect from these two closely spaced BiP  
190 binding sites. This is consistent with the absence of BiP-BiP FRET on the E-peptide (Figure 2F). Site 1 can

191 outcompete site 2 in binding to BiP under ADP conditions, with characteristically slow displacement  
192 kinetics (Supplemental Figure 5A). We conclude that site 1 is the dominant BiP binding site on proIGF2.

193 Grp94 has minimal binding for sites 1-3 and mature IGF2 under both ATP and ADP conditions  
194 (Supplemental Figure 6), demonstrating that these sites are specific to BiP. Interestingly, site 1 binds  
195 non-specifically to BSA whereas sites 2&3 do not bind BSA (Supplemental Figure 7), suggesting that BiP's  
196 preferential binding to site 1 may serve a biological role in preventing non-specific interactions with this  
197 region of the E-peptide. We utilized the slow displacement kinetics of site 2 to test whether BiP binds E-  
198 peptide oligomers specifically. If BiP binds E-peptide oligomers specifically, a BiP:site 2 complex must  
199 first release site 2 before binding the E-peptide oligomer, and the displacement kinetics should be slow.  
200 If BiP binds E-peptide oligomers non-specifically no such displacement will be observed. E-peptide  
201 oligomers show slow displacement kinetics that are similar to that of site1 and site 2 (Supplemental  
202 Figure 5B) indicating that BiP binds E-peptide oligomers specifically and in a manner similar to a typical  
203 peptide client, albeit with much higher affinity.

204

### 205 **Electrostatic steering enhances BiP affinity for E-peptide oligomers**

206 The charge difference between BiP and both proIGF2 and the E-peptide (Figure 1) suggests that high  
207 affinity binding might have an electrostatic contribution. If true, BiP affinity for proIGF2 and E-peptide  
208 oligomers should be salt dependent due to charge screening. The affinity of BiP for E-peptide oligomers  
209 as measured by BiP<sub>SBD</sub> FRET is indeed highly salt dependent, where increasing the salt concentration  
210 weakens BiP's affinity for E-peptide oligomers under both ADP and ATP conditions (Figure 4A,  
211 Supplemental Figures 8A-B). The highest salt concentration data in the presence of ATP requires fixing  
212 the saturating FRET efficiency value, and therefore these  $K_D$  values are not as well defined and should be  
213 interpreted cautiously (these data are marked with an asterisk in Figure 4A). While salt-dependent  
214 affinities cannot be measured for BiP and proIGF2 because of BiP-BiP FRET (Figures 2D,F), the FP assay  
215 described in Figure 2A shows a loss of binding between BiP and proIGF2 oligomers with increasing salt  
216 (Supplemental Figure 8C).

217 The strong salt dependence of BiP binding E-peptide oligomers is observed with different salts (KCl,  
218 NaCl, and KI, see Table 1), as expected for electrostatic screening rather than a specific ionic interaction.  
219 ProIGF2 light scattering is minimally salt-dependent (Supplemental Figures 1C,D), and E-peptide does  
220 not scatter light at any salt condition tested (Supplemental Figure 1C), suggesting that oligomer size  
221 changes cannot explain the strong salt-dependent binding of BiP to both proIGF2 and E-peptide.

223

224

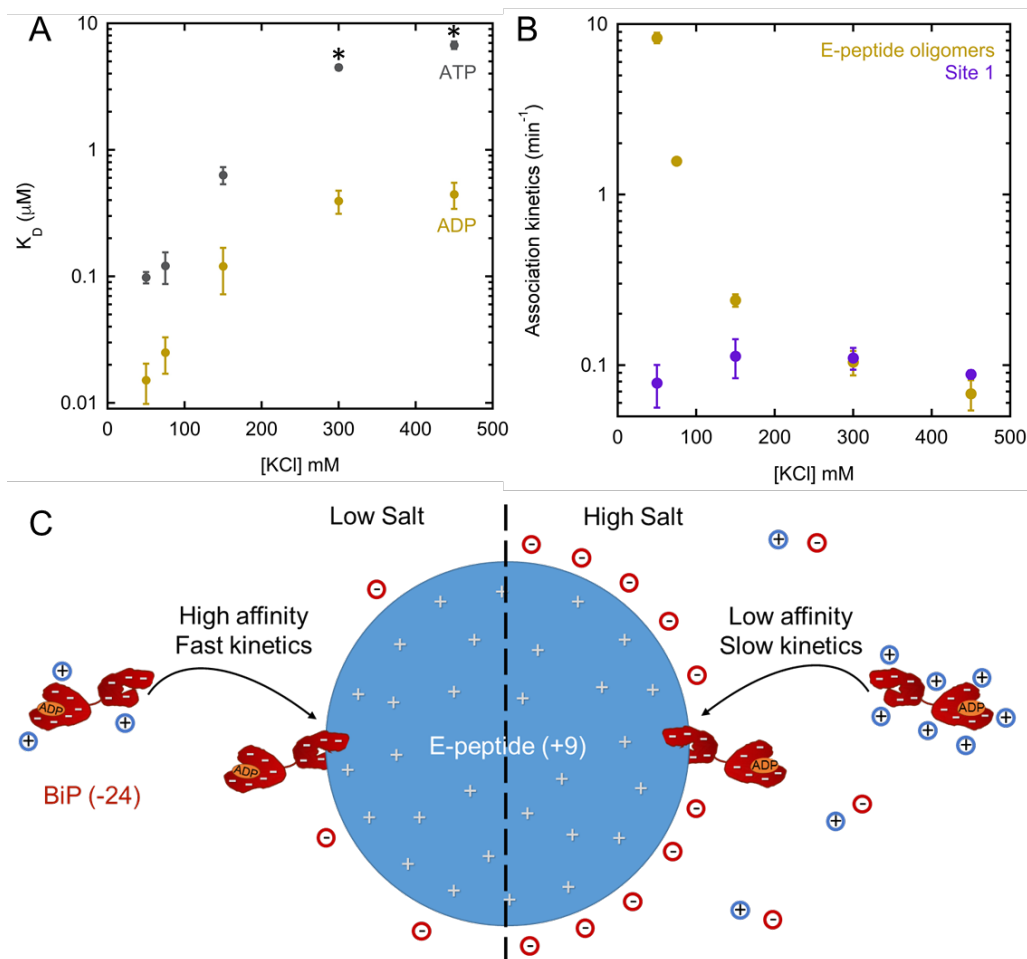

225

226 **Figure 4. Influence of salt on BiP binding E-peptide oligomers. (A)** Salt dependence of  $K_D$  for BiP  
 227 binding E-peptide as measured by BiP<sub>SBD</sub> FRET assay in the presence of ADP or ATP. Individual binding  
 228 curves shown in Supplemental Figure 8A&B. Asterisks indicate lower confidence of fitting, as described  
 229 in Supplemental Figure 8B. **(B)** Salt dependence of association kinetics between BiP and 0.1 μM E-  
 230 peptide as measured by BiP<sub>SBD</sub> FRET assay under ADP conditions. Association kinetics between site 1  
 231 and 0.1 μM BiP was determined by FP (Methods). **(C)** Model for BiP's salt-dependent binding of E-  
 232 peptide oligomers. Negative charge for BiP and positive charge for E-peptide is shown as grey dashes  
 233 and grey plus-signs, respectively. Counterions to E-peptide and BiP are shown as negatively-charged red  
 234 circles and positively-charged blue circles, respectively.

235

236 Given the dramatic influence of salt on the affinity of BiP to E-peptide oligomers, we questioned  
 237 whether electrostatic steering, which is characterized by salt-dependent association rates leading to  
 238 salt-dependent binding affinity, is the underlying cause. At low salt BiP binding is indeed accelerated  
 239 and we therefore performed the measurements at 10°C to slow the kinetics such that they can be  
 240 quantified over a large range of rates. Figure 4B shows salt-dependent association rates between BiP  
 241 and E-peptide in which association kinetics decrease by ~100-fold between 50 to 450 mM KCl. In  
 242 comparison, Site 1 has no salt-dependent changes in association rates and converges with E-peptide

243 association rates at high salt. Collectively, the above results indicate that electrostatic steering  
244 enhances BiP affinity for proIGF2 and E-peptide oligomers (Figure 4C).

245

## 246 **Two energetic contributions to BiP binding to E-peptide oligomers**

247 Comparing the salt-dependent affinity of BiP to E-peptide oligomers versus its affinity for monomeric  
248 peptides (Figure 5A) shows that two distinct energetic contributions underpin BiP's high affinity for E-  
249 peptide oligomers. BiP binds sites 1-3 with minimal salt-dependence, even though binding sites 2 and 3  
250 are positively charged. This lack of salt dependence is also observed for the extended fragments  
251 centered at site 1 (residues 92-120 and 92-139). Importantly, BiP's affinity for E-peptide oligomers at  
252 high salt matches that of all the monomeric fragments that include site 1. This suggest that two  
253 energetic contributions enable BiP to bind the E-peptide oligomers with high affinity. The first  
254 contribution is from the typical binding affinity between BiP and site 1, and the second contribution is  
255 from electrostatic attraction between BiP and the E-peptide oligomer. As the electrostatic contribution  
256 is screened by salt BiP's affinity for E-peptide oligomers converges to the measured affinities of all  
257 constructs that contain site 1.

258 The data in Figure 5A enables the electrostatic contribution to binding to be determined at any salt  
259 concentration. For example, under ADP conditions and at 50 mM KCl BiP binds E-peptide oligomers with  
260 ~60-fold higher affinity than to site 1 ( $K_D = 0.015 \pm 0.005 \mu\text{M}$  compared to  $K_D = 0.95 \pm 0.17 \mu\text{M}$ ). A  
261 similar analysis under ATP conditions shows that electrostatic attraction provides a ~130-fold  
262 enhancement of affinity of BiP to E-peptide oligomers at 50 mM KCl (Supplemental Figure 9). While the  
263 influence of salt has a dramatic influence on BiP binding oligomers, only minor effects are observed for  
264 BiP binding the monomeric site 1 peptide. For example, increasing salt provides a slight enhancement of  
265 site 1 binding under ADP conditions ( $K_D$  of  $0.95 \pm 0.17 \mu\text{M}$  at 50 mM KCl versus  $0.46 \pm 0.05 \mu\text{M}$  at 450  
266 mM KCl), and no salt-dependent affinity changes are observed under ATP conditions (Supplemental  
267 Figure 9). The agreement between the affinities measured indirectly using BiP<sub>SBD</sub> FRET assay and directly  
268 using FP at high salt confirms that the BiP<sub>SBD</sub> FRET measurements provide a reliable measurement of  
269 client affinity.

270 Theoretical predictions (see Chapter 9 in Physical Biology Of The Cell<sup>28</sup>) and experiments on viral  
271 capsids<sup>29</sup> provide a quantitative framework for understanding the influence of salt on electrostatic  
272 screening around large macromolecular assemblies. In particular, the free energy contribution of  
273 electrostatics from charged spherical assemblies should vary linearly with the square root of the salt  
274 concentration. Figure 5B shows the electrostatic contribution to BiP binding free energy of BiP versus  
275 the square root of the salt concentration. We indeed observe this expected linear relationship up until  
276 the point at which the electrostatics no longer contribute to binding (when  $\Delta G_{elec}^0=0$ ). While other  
277 factors may also contribute to the binding of BiP to E-peptide oligomers, our data is consistent with a  
278 model in which two energetic factors predominate. The first is the foundational hydrophobic  
279 interactions between BiP and site 1, which has the characteristically weak affinity of ~1 $\mu\text{M}$  and a  
280 minimal salt dependence. The second is the electrostatic contribution that is unique to the oligomerized  
281 the E-peptide and obeys the strong salt dependence predicted by electrostatic screening.



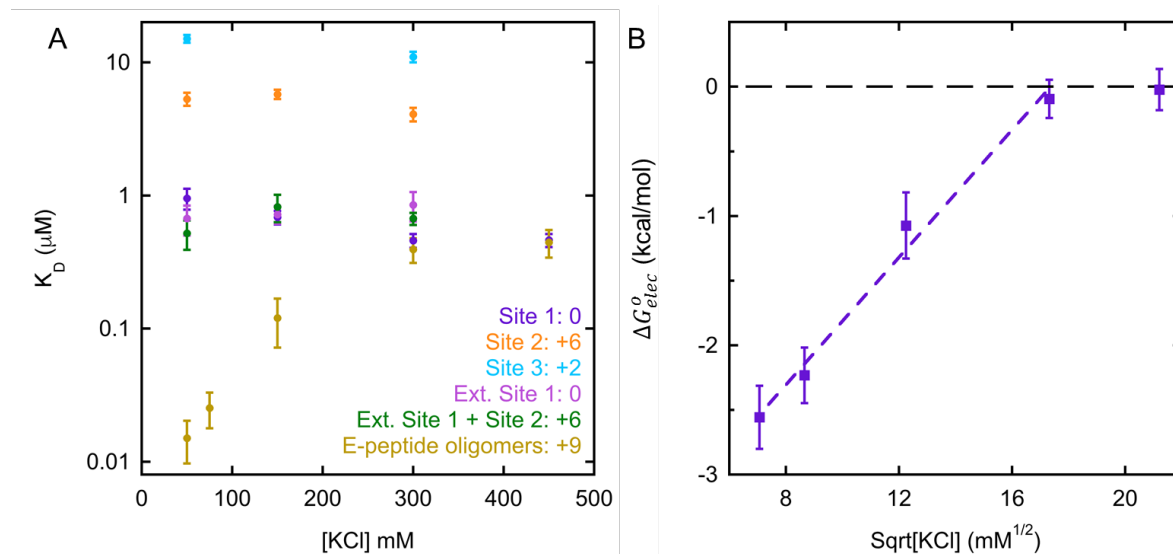

282  
 283 **Figure 5. Compilation of BiP's affinity for E-peptide and binding sites in presence of increasing salt**  
 284 **concentrations. (A)** Affinities of monomeric E-peptide fragments and the oligomeric E-peptide. Net  
 285 charge of each fragment is indicated next to name. Error bars are the SEM for at least three binding  
 286 curve replicates. **(B)** Electrostatic contribution as calculated by  $\Delta G_{elec}^o = -RT \ln(K_{D,site\ 1}/K_{D,E-peptide\ oligomers})$ ,  
 287 which is screened out by increasing salt<sup>28</sup>. Error bars are the propagated uncertainty from panel A. The  
 288  $K_{D,site\ 1}$  value at 50mM KCl is used to calculate  $\Delta G_{elec}^o$  at both 50 and 75 mM KCl. Purple dashed line  
 289 indicates linear fit ( $\Delta G_{elec}^o$  intercept:  $-4.3 \pm 0.2$  kcal/mol and slope:  $0.25 \pm 0.02$ ). Black dashed line  
 290 indicates  $\Delta G_{elec}^o = 0$ .

291  
 292 **The electrostatic driving force that favors BiP binding E-peptide oligomers is widely dispersed across**  
 293 **the E-peptide sequence**

294 E-peptide oligomers provide a favorable electrostatic contribution for BiP binding despite the fact that  
 295 primary binding site on the E-peptide (site 1) has no net-charge. Thus, we expect that E-peptide variants  
 296 containing site 1, but with lower net charge will have lower affinity for BiP. Recall that the E-peptide has  
 297 clusters of positively charged residues at conserved endoprotease cut sites (Figure 1B). Therefore, we  
 298 designed a series of truncations to successively remove each of these +3 charge clusters to determine  
 299 whether a single charge cluster dominates or whether each cluster contributes equally (Figure 6A). In  
 300 these experiments BiP is maintained at a low concentration, and the E-peptide constructs are titrated to  
 301 enable oligomerization. Figure 6B shows a progressive enhancement of BiP affinity for E-peptide  
 302 oligomers that are assembled from E-peptide constructs with progressively positive net charge. This  
 303 trend (dashed lines, Figure 6B) shows a convergence of the high affinity binding of BiP to E-peptide  
 304 oligomers to low affinity site 1 binding as the net charge on E-peptide constructs is reduced. This  
 305 convergence is conceptually similar to the convergence in oligomer and site 1 affinities with increasing  
 306 salt (Figure 6B). In both cases, negatively-charged BiP's electrostatic targeting towards positively-  
 307 charged E-peptide oligomers is screened physically by removing net charge from the E-peptide by way of  
 308 truncations or by increasing the salt concentration.



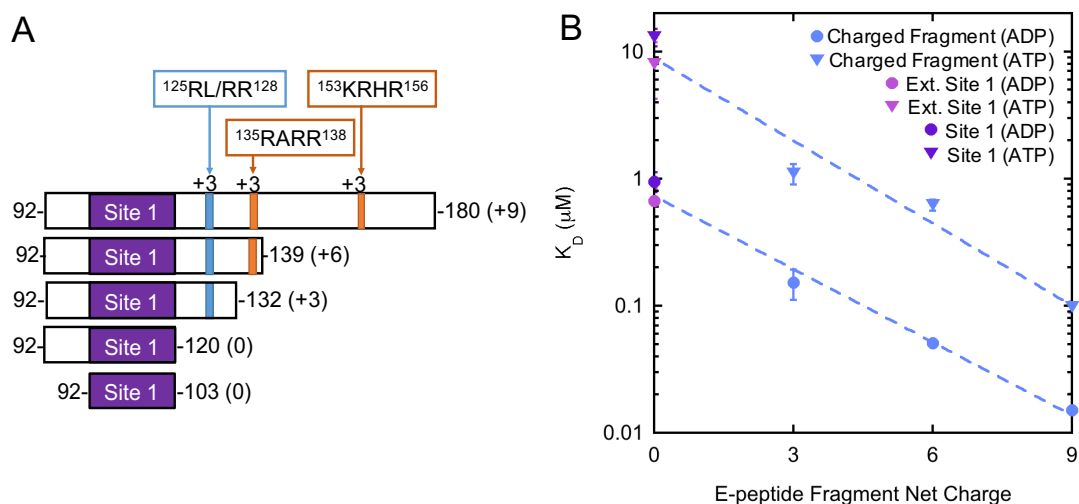

310  
 311 **Figure 6. BiP's interactions with E-peptide and E-peptide truncations of decreasing net charge. (A)** E-  
 312 peptide and E-peptide truncations with net charge and endoprotease cut sites are indicated for each  
 313 construct. **(B)** BiP's  $K_D$  for each E-peptide fragment listed in A, as a function of fragment's net charge.  $K_D$   
 314 data is from BiP<sub>SBD</sub> FRET, except for Ext. Site 1 and Site 1 which are from FP data. Error bars indicate  
 315 SEM for 3 replicates, and error bars may be smaller than data point. Dashed lines indicate a logarithmic  
 316 fit ( $K_D$  intercepts:  $0.73 \pm 0.10 \mu\text{M}$  (ADP);  $8.9 \pm 2.6 \mu\text{M}$  (ATP)). Slopes are:  $10^{-(0.19 \pm 0.01)x}$  (ADP);  $10^{-(0.22 \pm 0.03)x}$   
 317 (ATP), where  $x$  is the net charge of E-peptide fragment and the uncertainty is from the fitting error.

318  
 319 **Discussion**

320 The action of Hsp70-type chaperones on aggregates, oligomers, and fibrils is a crucial aspect of cellular  
 321 homeostasis, the adaptive response to environmental stress, and the progression of age-related  
 322 diseases<sup>30</sup>. However, heterogeneity of aggregates, oligomers, and fibrils imposes technical challenges in  
 323 determining how Hsp70s recognize oligomeric client states versus the monomeric peptide fragments  
 324 that are often used as model systems to study Hsp70:client binding. Here, by dissecting the mechanism  
 325 by which BiP recognizes proIGF2 and E-peptide oligomers, we discover that electrostatic attraction is a  
 326 powerful driving force that enables BiP to preferentially bind oligomeric client states. BiP binds E-  
 327 peptide oligomers with nanomolar affinity, but binds the monomeric constituent peptides with  
 328 micromolar affinity. In this regard BiP interacts very differently with proIGF2 oligomers compared to the  
 329 well-studied C<sub>H</sub>1 domain in which BiP binds full-length C<sub>H</sub>1 ( $K_D$  of  $4.2 \mu\text{M}$ ) with similar affinity to its  
 330 constituent peptide motif ( $K_D$  of  $12 \mu\text{M}$ )<sup>21,31</sup>. The predominant BiP binding site on proIGF2 is located at  
 331 the preptin hormone region of the E-peptide (site 1, Figure 3A), a region that does not fold<sup>32</sup>. This again  
 332 contrasts with the BiP recognition of C<sub>H</sub>1, in which the BiP binding site is buried after C<sub>H</sub>1 folds and forms  
 333 a disulfide-linked complex with C<sub>L</sub><sup>31</sup>. The preptin region binds non-specifically to BSA (Supplemental  
 334 Figure 7), suggesting a functional role for BiP in protecting this region from non-productive interactions  
 335 in the ER.

336 A strong electrostatic driving force causes BiP to preferentially bind oligomers. This is evident in the salt-  
 337 dependent affinity of BiP to E-peptide oligomers but not to the constituent monomeric peptides (Figure  
 338 5A). The energetic contribution from electrostatic screening varies with the square root of the salt

339 concentration (Figure 5B), as predicted theoretically<sup>28</sup>, and measured experimentally in the assembly of  
 340 viral capsids<sup>29</sup>. The electrostatic affinity enhancement, spanning approximately two orders of  
 341 magnitude, is reflected in the weakening influence of successive truncations that remove charge from  
 342 the E-peptide (Figure 6B), and the salt-dependent association rate of BiP binding E-peptide oligomers  
 343 (Figure 4B). Such salt-dependent association kinetics are characteristic of electrostatic steering between  
 344 large highly charged complexes as with the positively charged multimeric Von Willebrand factor binding  
 345 its negatively charged receptor glycoprotein Iba<sup>33</sup>. In this case, the association kinetics span  
 346 approximately two orders of magnitude between 80 to 500 mM salt<sup>33</sup>, a similar magnitude as what we  
 347 observe for BiP binding E-peptide oligomers (Figure 4B).

348 The electrostatic explanation underlying BiP's high affinity for oligomers provides a plausible explanation  
 349 for why Hsp70 chaperones interact with certain aggregated client proteins with high affinity. Figure 7 is  
 350 a compilation of previously measured Hsp70 affinities for monomeric and oligomeric clients, evaluated  
 351 by the predicted net charge of the client (data and references are in Supplemental Table 1). Hsp70s  
 352 bind peptides with a maximal affinity of  $\sim 1 \mu\text{M}$ . Even engineered peptides that are designed to have  
 353 high affinity for Hsp70, such as the Javelin sequence, only reach  $\sim 1 \mu\text{M}$ <sup>34</sup>. A similar upper limit appears  
 354 to apply to Hsp70 binding negatively charged clients such as  $\alpha$ -synuclein (net charge of -9) irrespective  
 355 of whether it is monomeric or oligomeric ( $K_D \sim 10 \mu\text{M}$ )<sup>8</sup>. Clathrin is a second example of a negatively  
 356 charged (net charge -64) oligomer, which Hsp70 also binds with low affinity ( $K_D \sim 3 \mu\text{M}$ )<sup>26</sup>.

357

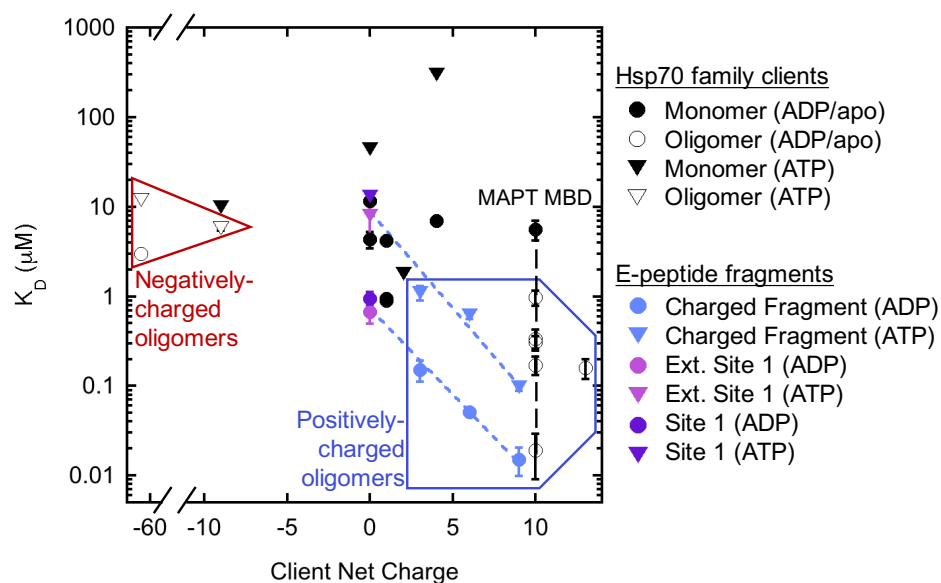

358

359 **Figure 7. Compilation of Hsp70 and BiP dissociation constants to monomeric and oligomeric clients,**  
 360 **sorted by net charge.** See Supplemental Table 1 for data and references. Black dashed line indicates  
 361 MAPT MBD  $K_D$  values with increasing size (1-2mer to fibril<sup>7</sup>).  $K_D$  data for E-peptide, E-peptide  
 362 truncations, and associated blue dashed lines are from Figure 6.

363

364 To our knowledge the only reported instances of Hsp70 binding with much higher affinity than  $\sim 1 \mu\text{M}$  is  
 365 in the case of aggregates of positively charged clients. For example, the binding of cytosolic Hsp70 (net

366 charge -11) to MAPT MBD (net charge +10) is directly proportional to the size of the oligomer size, with  
367 larger oligomers yielding higher affinities (Figure 7, black dashed line). Hsp70 binds MAPT MBD fibrils  
368 with ~10 nM affinity<sup>7</sup>, a value comparable to BiP affinity to E-peptide oligomers. A fast association rate is  
369 observed between Hsp70 and MAPT MBD<sup>7</sup> raising the possibility that electrostatic steering is at work,  
370 similar to our findings with BiP and E-peptide oligomers (Figure 4B). The affinity of BiP to E-peptide  
371 oligomers, as well as E-peptide truncations with different net charges (blue diagonal dashed lines, Figure  
372 7) all fall within the range of values measured for other positively charged clients. The data in Figure 7 is  
373 restricted to metazoan Hsp70s, however experiments with the bacterial Hsp70 homolog DnaK (net  
374 charge -30) suggest that this mechanism also applies. Specifically, DnaK has been reported to bind  
375 positively charged IAPP oligomers in the pM-range<sup>35</sup>. However, the affinity of DnaK for oligomers may  
376 not be directly comparable to metazoan Hsp70 data in Figure 7, because DnaK can bind monomeric  
377 peptides with ten-fold higher affinity than is observed for metazoan Hsp70s (Supplemental Table 2).

378 The idea that electrostatics target Hsp70s to positively charged oligomeric clients, provides predictions  
379 for future experiments. For example, the MAPT 3R and 4R isoforms, which also have a positive net  
380 charge, exhibit high affinity binding to Hsp70 (Supplemental Table 1) but their oligomerization state has  
381 not been determined<sup>36</sup>. The electrostatic explanation predicts that MAPT 3R and 4R isoforms should be  
382 oligomeric. In the case of IGF proteins, electrostatics should favor the binding of BiP to oligomeric states  
383 of proIGF1 (net charge +18), but not proinsulin (net charge -3). One additional area for future  
384 investigation is to better understand the role of oligomer size heterogeneity on BiP affinity. While Hsp70  
385 affinity for the MAPT MBD is proportional to the oligomer size (Figure 7, black dashed line) more  
386 detailed measurements are needed to determine if a similar relationship holds for BiP binding to E-  
387 peptide and proIGF2 oligomers.

388 Our findings have implications for how the ER responds to stress. A current model for the unfolded  
389 protein response (UPR) activation involves BiP binding to the luminal portion of key transmembrane  
390 proteins (IRE1 and PERK) that are held inactive when BiP is bound<sup>37</sup>. In this model, when the  
391 concentration of unfolded protein gets sufficiently high BiP will favor binding the client proteins rather  
392 than the UPR transmembrane proteins. Our results suggests that oligomerized clients within the ER  
393 could displace BiP from the UPR receptors due to the relatively high affinity of BiP towards oligomers.  
394 Thus, our results suggest that the UPR may be initiated by protein oligomerization/aggregation that  
395 could be independent of a rise in the concentration of unfolded proteins.

399

## 400 **Methods**

### 401 **Bioinformatics**

402 Predicted BiP-binding motifs on proIGF2 were calculated with BiPPred<sup>27</sup>. BiPPred calculates a predicted  
403 BiP-binding score for a 7-residue motif, and an average BiPPred score for each residue is calculated and  
404 plotted in Figure 3A. Net charge is calculated from sum of  $-(\text{Asp} + \text{Glu}) + (\text{Lys} + \text{Arg})$  residues.

### 405 **Protein purification**

406 6-his tagged BiP was purified via Ni-NTA affinity chromatography, and 6-his tag was cleaved with TEV.  
407 Subsequent Ni-NTA affinity chromatography removed 6-his tag and TEV, anion-exchange

408 chromatography removed nucleotide bound to BiP, and BiP was buffer exchanged with size-exclusion  
409 chromatography. BiP was stored in 25 mM Tris pH 7.5, 50 mM KCl, 1 mM DTT, and 2% glycerol.

410 ProIGF2, E-peptide, E-peptide 92-139, E-peptide 92-120, and mature IGF2 were purified from inclusion  
411 bodies. E-peptide, E-peptide 92-139, and E-peptide 92-120 contained an N-terminal 6-histidine tag and  
412 cysteine mutation at Ser95 for FITC labeling. Briefly, inclusion bodies were washed and insoluble protein  
413 was denatured in an 8 M urea, 25 mM Tris buffer containing reducing agent TCEP. Protein was purified  
414 by ion-exchange chromatography and/or Ni-NTA affinity chromatography in denaturing conditions.  
415 Proteins used in FP assays were labeled with FITC-maleimide. Proteins were stored denatured in buffer  
416 containing 8 M urea.

417 BiP-binding sites 1 and 3 were synthesized by Alan Scientific (Gaithersburg, MD) and site 2 was  
418 synthesized by Genscript (Piscataway, NJ). All peptides are N-terminally labeled with FITC via an amino  
419 hexanoic acid linker. For FITC-Mature-1cys, mature IGF2 was mutated to remove all cysteines except  
420 C70, which was labeled with FITC.

#### 421 **Fluorescence depolarization**

422 50 nM FITC-labeled BiP D27C or BiP NBD D27C was incubated with buffer containing 25 mM MES pH 6.0,  
423 50/150/300 mM KCl, 1 mM MgCl<sub>2</sub>, 1 mM nucleotide (ADP or ATP), 0.5 mg/mL BSA, and 1 mM DTT until  
424 polarization values reached equilibrium, for about 30 minutes, at 37°C. Experiments were also  
425 conducted in the absence of BSA, when noted. Clients were added directly from purified 8 M urea  
426 stock, except proIGF2 (diluted out of denaturant 1:10 in 50 mM MES pH 6.0, 2 mM TCEP and incubated  
427 20-30 minutes). Fluorometer setup had an excitation wavelength at 492 nm and emission wavelength  
428 at 520 nm with 6 nm slit widths, and 1 second integration time.

429 FP experiments containing FITC-labeled BiP-binding site peptides used 50 nM of labeled peptides, except  
430 for FITC-Mature-1cys (57.5 nM). For ATP experiments, FITC-labeled peptide was added to BiP pre-  
431 incubated for 20 minutes in a buffer containing 25 mM buffer (MES or Tris), 50/150/300 mM KCl, 1 mM  
432 MgCl<sub>2</sub>, 1 mM ATP, 0.5 mg/mL BSA, and 1 mM DTT at 37°C. For ADP experiments, contaminating  
433 amounts of ATP were removed from 1 mM ADP with 0.005 units hexokinase, 1 mM glucose, and 5 mM  
434 MgCl<sub>2</sub> and incubated 1 hour at 37°C. Polarization measurements for FITC-E-peptide 121-139 were taken  
435 with excitation at 493 nm, emission at 522 nm, 5 nm slit widths, and a 1 second integration time.  
436 Polarization measurements with FITC-E-peptide 103-120 and FITC-E-peptide 151-169 used 493 nm  
437 excitation wavelength, 518 nm emission wavelength, and 6 nm slit widths. FP experiments with FITC-E-  
438 peptide 92-120 or FITC-E-peptide 92-139 had an excitation wavelength of 492 nm and emission  
439 wavelength of 522 nm.

440  $K_D$  values were calculated using the single-site binding equation,

$$441 \quad P = \frac{a[client]}{K_D + [client]} + c$$

442 (Equation 1)

443 where  $P$  is polarization,  $a$  is the polarization amplitude and  $c$  is the polarization value in the absence of  
444 client. Association kinetics for 0.1 $\mu$ M BiP to site 1 (Figure 4B) was determined by a linear extrapolation

445 of association kinetics measured over the complete range of BiP concentrations from Supplemental  
446 Figure 4A.

#### 447 **FRET**

448 For the BiP-BiP FRET assay, in separate reactions, BiP was labeled with donor (AlexaFluor 555 C<sub>2</sub>  
449 maleimide) or acceptor (AlexaFluor 647 C<sub>2</sub> maleimide) fluorophores. 25 nM donor-labeled BiP and 25  
450 nM acceptor-labeled BiP were incubated until FRET efficiency reached equilibrium, about 20-30  
451 minutes, in buffer containing 25 mM MES pH 6.0, 50 mM KCl, 1 mM ADP, 0.5 mg/mL BSA, and 1 mM DTT  
452 at 37°C. ADP was pretreated with 0.005 units hexokinase, 1 mM glucose, and 5 mM MgCl<sub>2</sub> for 1 hour at  
453 37°C. Clients were added in the same manner used in FP experiments. Fluorometer setup had donor  
454 excitation wavelength at 532 nm, donor emission wavelength at 567 nm, and an acceptor emission  
455 wavelength at 668 nm, and 6 nm slit widths. FRET efficiency (E) was calculated by the donor (D) and  
456 acceptor (A) emission fluorescence:

$$E = \frac{A}{D + A}$$

457 (Equation 2)

459 For the BiP<sub>SBD</sub> FRET assay, a previously described BiP double mutant G518C and Y636C was  
460 simultaneously labeled with donor and acceptor fluorophores, AlexaFluor 555 C<sub>2</sub> maleimide and  
461 AlexaFluor 647 C<sub>2</sub> maleimide, respectively<sup>21</sup>. In the BiP<sub>SBD</sub> FRET assay, the value of the FRET efficiency is  
462 therefore limited to a value of 0.5 because at most only 50% of the BiP molecules can be labeled with  
463 one donor and one acceptor fluorophore. BiP was diluted to 50 nM into buffer containing 25 mM MES  
464 pH 6.0, 50/150/300/450 mM KCl, 1 mM MgCl<sub>2</sub>, 1 mM ATP, 0.5 mg/mL BSA, and 1 mM DTT. Experiments  
465 with ADP contained 1 mM ADP. If indicated, hexokinase-treated ADP was incubated as above  
466 experiments. Experiments with 5 % ATP had 1 mM ADP and 0.05 mM ATP and were completed at 50  
467 mM KCl. Fluorometer setup had a donor excitation wavelength at 532 nm, donor emission wavelength  
468 at 567 nm, and acceptor emission wavelength at 668 nm, 4 nm slit widths, and 0.5 second integration  
469 time.  $K_D$  values were calculated using a single-site binding equation,

$$E = \frac{a[client]}{K_D + [client]} + c$$

470 (Equation 3)

472 where  $a$  is the FRET efficiency amplitude and  $c$  is the FRET efficiency value in the absence of client.  $K_D$   
473 values < 0.2 μM were determined via

$$E = c + a \frac{[B + x + K_D] - \sqrt{[B + x + K_D]^2 - 4[B]x}}{2[B]}$$

474 (Equation 4)

476 where  $x$  is the concentration of client E-peptide,  $K_D$  is the dissociation constant between BiP and client,  
477 and  $B$  is the concentration of BiP<sub>SBD</sub> FRET-labeled protein used in experiments.

#### 478 **Light scattering**

479 ProIGF2 and E-peptide were assayed for light scattering with an absorbance at 320 nm at 25°C.

480 Background was subtracted at 700 nm. 2 μM of each protein was prepared in buffer containing 25 mM

481 MES pH 6.0, 1 mM MgCl<sub>2</sub>, 1 mM ATP, 0.3 mM TCEP. Immediately before assay, proIGF2 was diluted out  
482 of urea into buffer containing 50 mM MES pH 6 and 2 mM TCEP.

### 483 **Dynamic light scattering**

484 DLS data was obtained using a DLS/SLS-5022F from ALV (ALV-Laser Vertriebsgesellschaft m.b.H.) coupled  
485 with a 22mW HeNe Laser from JDS Uniphase Corporation. E-peptide and proIGF2 were diluted into 50  
486 mM MES pH 6.0, 50 mM KCl, 2 mM TCEP, 1 mM MgCl<sub>2</sub>, and 1 mM ATP. 10 rounds of 20 seconds were  
487 used for data collection at 25°C. Protein sample was monitored at 90° by laser light scattering at 630  
488 nm. Size-distribution analysis from an intensity correlation function was used to attain R<sub>H</sub><sup>38</sup>.

### 489 **ATPase assay**

490 ATPase activity was measured by depletion of NADH via an enzyme-linked assay with pyruvate kinase  
491 and lactose dehydrogenase. 2 μM BiP was assayed in 25 mM MES pH 6.0, 50 mM KCl, 1 mM MgCl<sub>2</sub>, 1  
492 mM ATP, 1 mM DTT, 0.5 mM NADH, 0.5 mM PEP, 0.1 μM pyruvate kinase, 0.1 μM lactose  
493 dehydrogenase, and 2.5 μM client protein at 37°C. NADH depletion was monitored at an absorbance of  
494 340 nm. ATPase rates reported are an average of 3 measurements, and the error is the SEM.

495

### 496 **Acknowledgements**

497 We thank Linda Hendershot, Daniel Oprian, and Tijana Ivanovic for providing helpful feedback on the  
498 results. Research for this project was supported by NIH R01 GM115356.

499

500

501

502

| [Salt] mM | NaCl, $K_D$ ( $\mu\text{M}$ ) | KI, $K_D$ ( $\mu\text{M}$ ) | KCl, $K_D$ ( $\mu\text{M}$ ) |
|-----------|-------------------------------|-----------------------------|------------------------------|
| 50        | $0.0047 \pm 0.0022$           | $0.021 \pm 0.003$           | $0.015 \pm 0.005$            |
| 300       | $0.29 \pm 0.03$               | $0.51 \pm 0.10$             | $0.39 \pm 0.08$              |

503 **Table 1.** BiP dissociation constants for E-peptide using BiP<sub>SBD</sub> FRET assay with different salts, NaCl, KI,  
504 and KCl, in the presence of ADP.

505



506

507 **Supplemental Figures & Tables**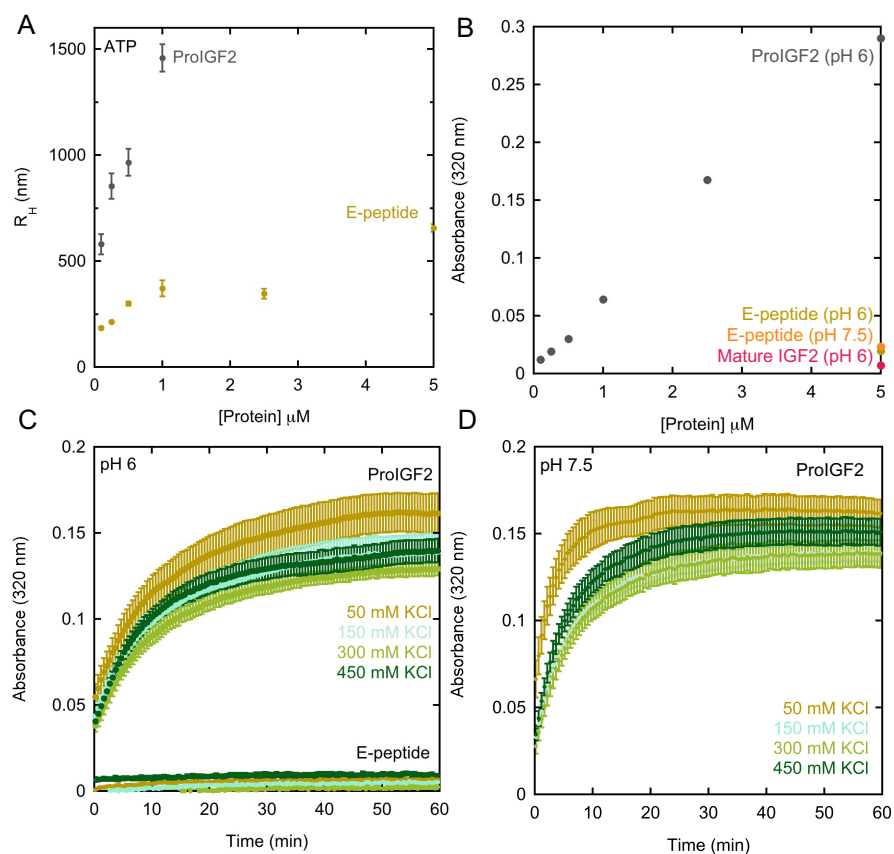

508

509 **Supplemental Figure 1. ProIGF2, E-peptide, and mature IGF2 light-scattering (LS) data.** (A) Average  
 510 hydrodynamic radius ( $R_H$ ) of proIGF2 and E-peptide oligomers as measured by DLS. (B) Concentration-  
 511 dependent LS data with proIGF2 shown with 5  $\mu\text{M}$  E-peptide and mature IGF2. (C) LS data with 2  $\mu\text{M}$   
 512 proIGF2 and E-peptide at pH 6 and increasing salt concentrations. Rates of proIGF2 LS at pH 6 with  
 513 increasing KCl are  $0.072 \pm 0.001$ ,  $0.076 \pm 0.001$ ,  $0.080 \pm 0.003$ , and  $0.091 \pm 0.001$   $\text{min}^{-1}$ . (D) LS data with  
 514 proIGF2 at pH 7.5 and increasing salt concentrations. Rates of proIGF2 LS at pH 7.5 with increasing KCl  
 515 are  $0.23 \pm 0.02$ ,  $0.12 \pm 0.001$ ,  $0.12 \pm 0.004$ , and  $0.14 \pm 0.004$   $\text{min}^{-1}$ . Absorbance data was collected at  
 516 320 nm with a background subtraction of 700 nm. Error bars indicate SEM for 3 replicates.

517

518

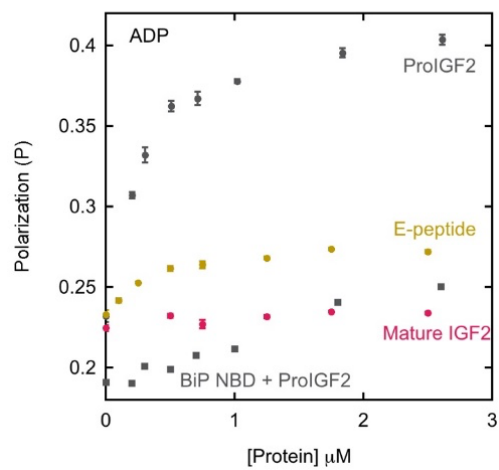

519

520 **Supplemental Figure 2.** FP data with FITC-BiP and proIGF2, E-peptide and mature IGF2 (circles) and  
521 FITC-BiP NBD binding proIGF2 (squares) in ADP conditions.

522

523

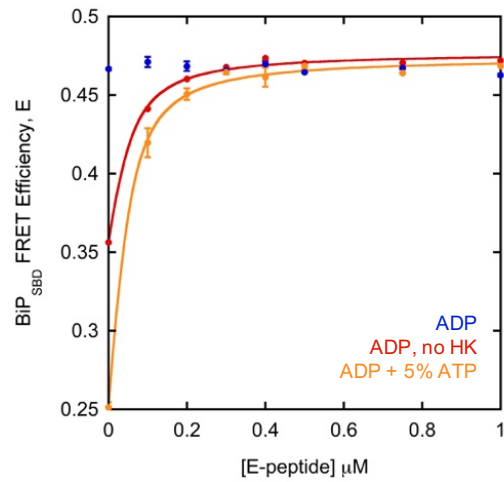

524

525 **Supplemental Figure 3. BiP<sub>SBD</sub> FRET efficiency in the presence of E-peptide with HK-treated ADP**  
526 **(blue), ADP without an HK treatment (red,  $K_D = 0.015 \pm 0.005 \mu\text{M}$ ) and ADP + 5% ATP (yellow,  $K_D =$**   
527  **$0.019 \pm 0.004 \mu\text{M}$ ). Solid line is fit to equation 4. Error bars indicate SEM for at least 3 replicates.**

528

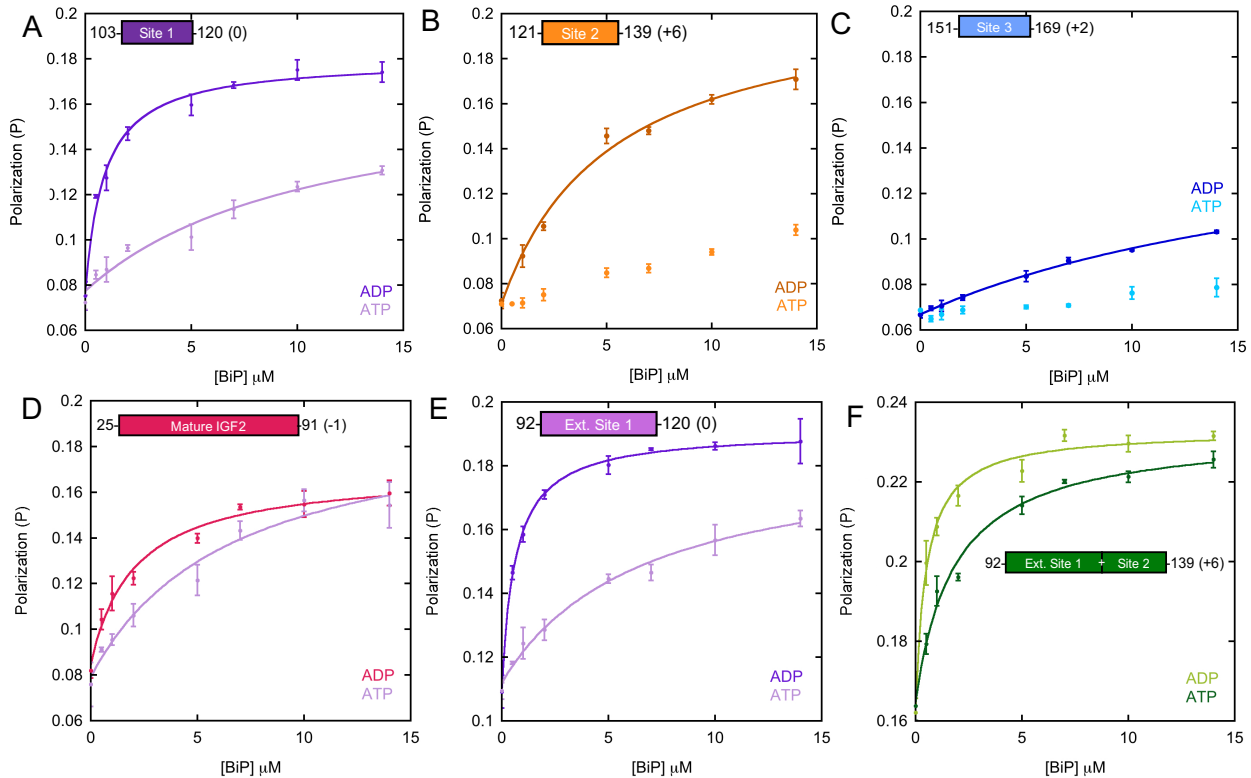

530

531 **Supplemental Figure 4. FP BiP binding assay with FITC-labeled E-peptide fragments.** Solid lines  
 532 indicate fit to equation 1, in cases where  $K_D$  values can be determined. **(A)** BiP affinity for site 1 is:  $0.95 \pm$   
 533  $0.17 \mu\text{M}$  and  $13 \pm 2 \mu\text{M}$ , under ADP and ATP conditions respectively.  $K_D$  under ATP conditions is  
 534 determined using same maximum amplitude as ADP condition. **(B)** BiP affinity for site 2 is  $5.3 \pm 0.6 \mu\text{M}$   
 535 under ADP conditions. **(C)** BiP affinity for site 3 is  $15 \pm 1 \mu\text{M}$  under ADP conditions. **(D)** FP binding assay  
 536 with FITC-labeled mature IGF2<sup>1 Cys</sup> and BiP in ADP and ATP states. Fit values as calculated from Equation  
 537 1 in the presence of ADP and ATP are  $2.7 \pm 1.0$  and  $9.7 \pm 4.5 \mu\text{M}$ , respectively. **(E)** BiP affinity for  
 538 extended site 1 (residues 92-120) is:  $0.67 \pm 0.17 \mu\text{M}$  and  $8.0 \pm 3.8 \mu\text{M}$ , under ADP and ATP conditions  
 539 respectively. **(F)** BiP affinity for extended site 1&2 (residues 92-139) is:  $0.52 \pm 0.13 \mu\text{M}$  and  $1.9 \pm 0.6 \mu\text{M}$ ,  
 540 under ADP and ATP conditions respectively. All error bars indicate SEM for three replicates.

541

542

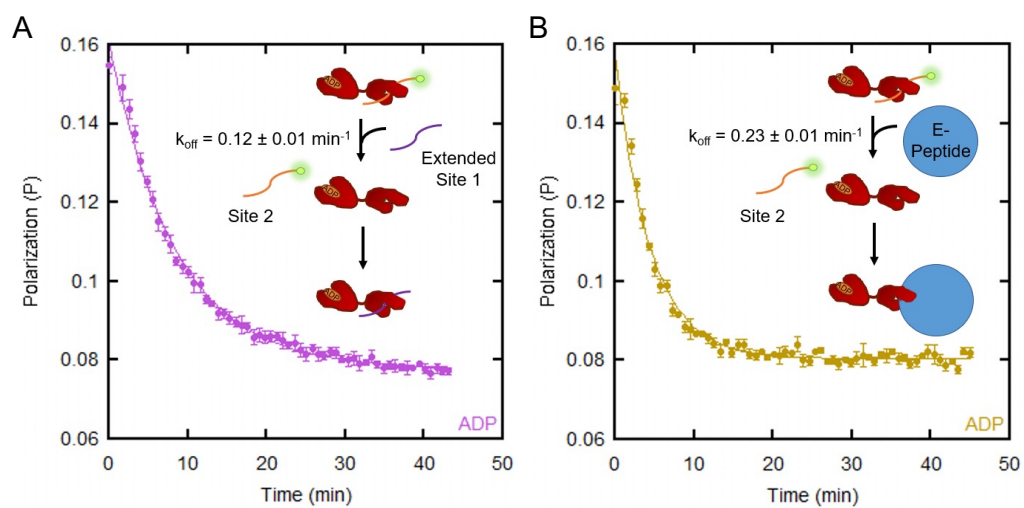

543

544 **Supplemental Figure 5. Binding competition experiments.** 50 nM FITC-labeled site 2 was prebound to  
545 5.3 $\mu$ M BiP under ADP conditions. **(A)** Competition with 10 $\mu$ M of extended site 1. **(B)** Competition with  
546 5.3 $\mu$ M of oligomerized E-peptide. Solid lines are a fit to an exponential decay. Error bars are the SEM for  
547 three replicates.

548

549

550

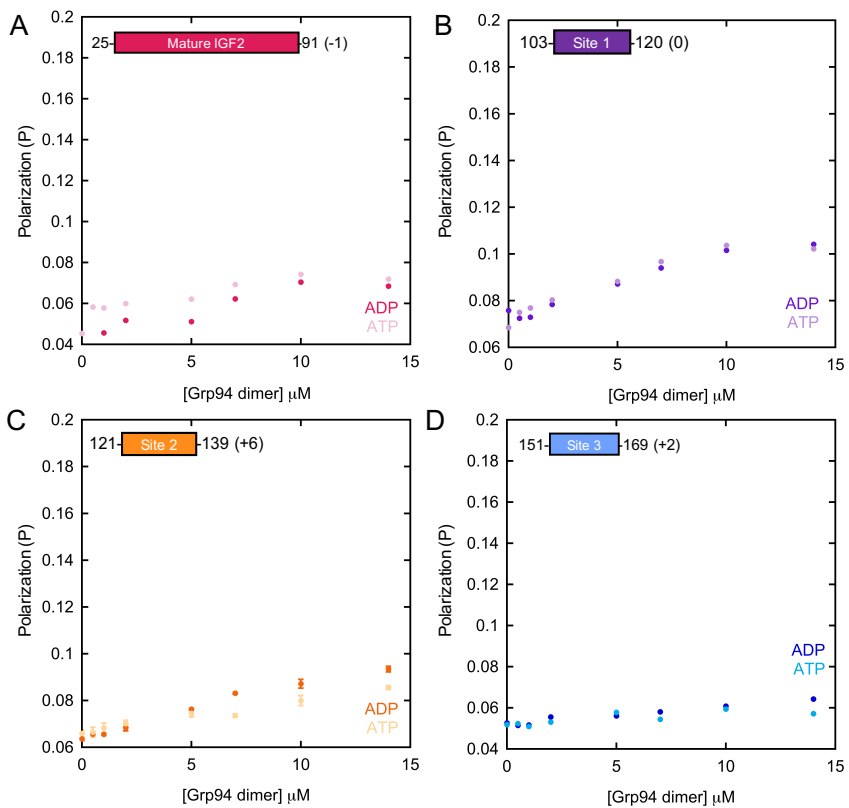

551

552 **Supplemental Figure 6. FP assay with FITC-labeled BiP binding-site peptides and mature IGF2 (1**  
553 **cysteine mutant) in the presence of Grp94 and ADP or ATP. Error bars indicate SEM for 3 replicates,**  
554 **where present. Y-axis is identical to Supplemental Figure 4 with BiP for comparison.**

555

556

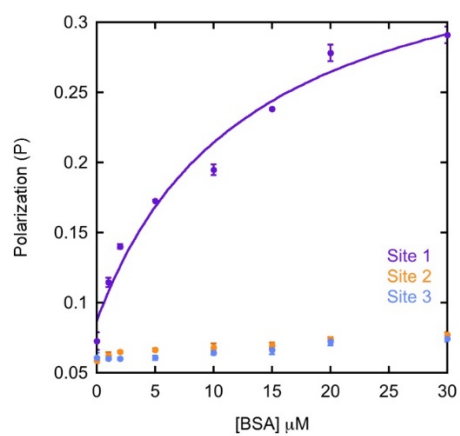

557

558 **Supplemental Figure 7. FP assay with FITC-labeled site 1, 2, or 3 binding BSA.** Solid line indicates fit to  
559 equation 1 ( $K_D: 13 \pm 2 \mu\text{M}$ ). Error bars indicate SEM of 3 trials.

560



561

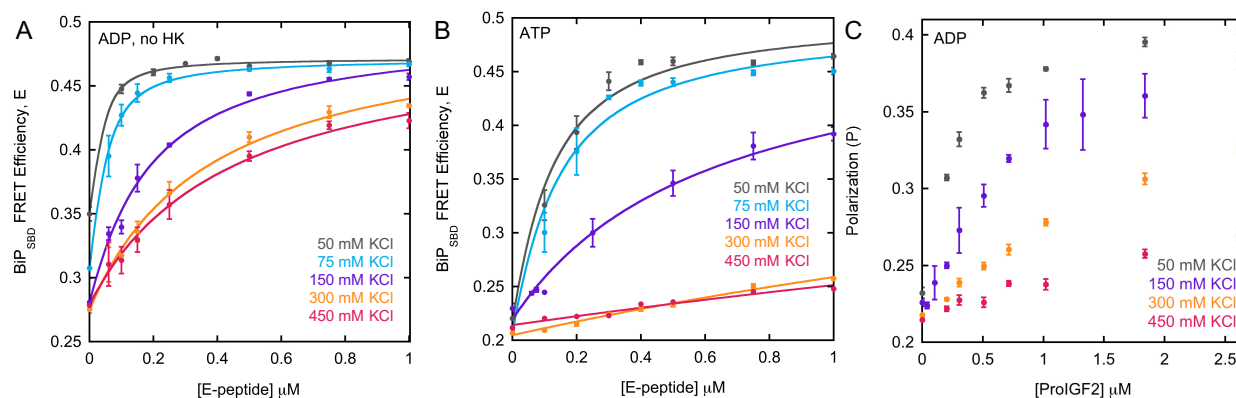

562

563 **Supplemental Figure 8. BiP binding E-peptide and proIGF2 at increasing salt concentrations. (A)** Salt-  
564 dependence of BiP<sub>SBD</sub> FRET assay with E-peptide oligomers and non-HK treated ADP. Fit values of binding  
565 affinity are shown in Figure 4A. Solid lines for 50, 75, and 150 mM KCl are a fit to equation 4, and lines  
566 for 300 and 450 mM KCl are a fit to equation 3. **(B)** Salt-dependence of the BiP<sub>SBD</sub> FRET assay with E-  
567 peptide oligomers under ATP conditions. Fit values of binding affinity are shown in Figure 4A. Solid lines  
568 for 50 and 75 mM KCl are a fit with equation 4, and 150, 300, and 450 mM KCl data are fit with equation  
569 3 and a maximum FRET efficiency set to 0.5. **(C)** BiP binding proIGF2 oligomers as a function of  
570 increasing KCl concentration using FP assay with FITC-labeled BiP, in the presence of ADP. Error bars  
571 indicate SEM for at least 3 replicates.

572

573

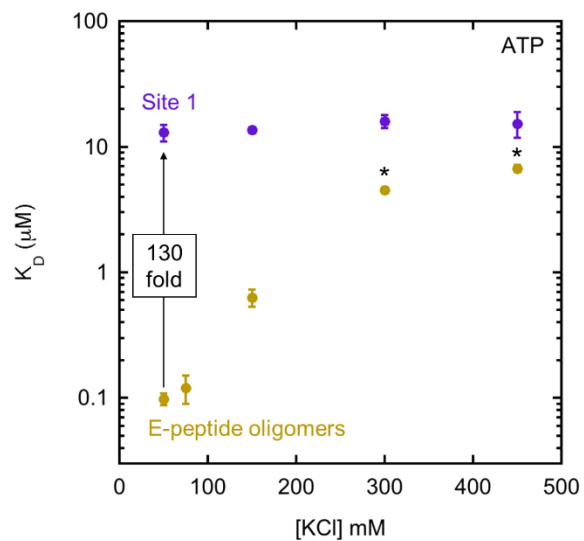

574

575 **Supplemental Figure 9. Influence of salt on BiP's affinities for E-peptide oligomers and site 1 under**  
576 **ATP conditions.**  $K_D$  data from E-peptide 103-120 is from FP data in Supplemental Figure 4A.  $K_D$  data  
577 from E-peptide from Supplemental Figure 8B. Error bars are the SEM for at least three replicates.  
578 Asterisks indicate lower confidence of fitting, as described in Supplemental Figure 8B.

579

580

581

582

| Client                                           | Hsp70 | K <sub>D</sub> (μM) | Monomer? | Net charge | Nucleotide          | Ref |
|--------------------------------------------------|-------|---------------------|----------|------------|---------------------|-----|
| C <sub>H</sub> 1 domain                          | BiP   | 4.2±0.4             | Yes      | +1         | ADP                 | 31  |
| HTFP AVL peptide                                 | BiP   | 11.6±0.6            | Yes      | 0          | ADP                 | 21  |
| MAPT MBD<br>Fibril                               | Hsp70 | 0.02±0.01           | No       | +10        | none                | 7   |
| MAPT MBD 10mer+                                  | Hsp70 | 0.17±0.04           | No       | +10        | none                | 7   |
| MAPT MBD 6-10mer                                 | Hsp70 | 0.34±0.09           | No       | +10        | none                | 7   |
| MAPT MBD 3-5mer                                  | Hsp70 | 0.97±0.19           | No       | +10        | none                | 7   |
| MAPT MBD 1-2mer                                  | Hsp70 | 5.6±1.4             | Yes      | +10        | none                | 7   |
| MAPT 3R*                                         | Hsc70 | 0.31±0.05           | *        | +10        | none                | 36  |
| MAPT 4R*                                         | Hsc70 | 0.16±0.04           | *        | +13        | none                | 36  |
| α-synuclein fibril                               | Hsp70 | 5.8±0.4             | No       | -9         | ATP                 | 8   |
| α-synuclein monomer                              | Hsp70 | ~10                 | Yes      | -9         | ATP                 | 8   |
| NR peptide <sup>^</sup>                          | BiP   | 0.95                | Yes      | +1         | none                | 39  |
| leukocyte antigen B*2702-<br>derived peptide Bw4 | Hsp70 | 1.8                 | Yes      | +2         | ATP                 | 40  |
| NLLRLTGW <sup>^</sup> (Javelin 1)                | Hsp70 | 0.9                 | Yes      | +1         | ADP                 | 34  |
| Faf1 peptide <sup>^</sup> (FYQLALT)              | Hsc70 | 4.3±0.9             | Yes      | 0          | ADP                 | 25  |
| Faf1 peptide <sup>^</sup> (FYQLALT)              | Hsc70 | 37-51               | Yes      | 0          | ATP                 | 25  |
| Clathrin <sup>#</sup>                            | Hsp70 | 3                   | No       | -64        | 90% ADP,<br>10% ATP | 26  |
| Clathrin <sup>#</sup>                            | Hsp70 | 12                  | No       | -64        | ATP                 | 26  |

|                                                                     |       |     |     |    |                     |               |
|---------------------------------------------------------------------|-------|-----|-----|----|---------------------|---------------|
| Cytochrome c peptide <sup>@</sup><br>(IFAGIKKKAERADLIAYLKQAT<br>AK) | Hsp70 | 7   | Yes | +4 | 90% ADP,<br>10% ATP | <sup>26</sup> |
| Cytochrome c peptide <sup>@</sup>                                   | Hsp70 | 300 | Yes | +4 | ATP                 | <sup>26</sup> |

583 **Supplemental Table 1. Compilation of Hsp70 family dissociation constants towards client proteins.**

584 \*Oligomerization state for MAPT 3R and 4R not stated. # Clathrin sequence from *B. taurus* and net  
585 charge calculated with one heavy chain and one light chain A. Net charge calculated with one heavy  
586 chain and one light chain B is -58. @ Peptide from *C. livia* sequence. ^ indicates synthetic client  
587 sequences. All other client sequences are from *H. sapiens*. Peptide clients are assumed to be  
588 monomeric.

589

590

591

592

| Client                                                 | K <sub>d</sub> (μM) | Monomer? | Net charge | Nucleotide | Ref           |
|--------------------------------------------------------|---------------------|----------|------------|------------|---------------|
| Peptide pp*                                            | 0.06                | Yes      | +4         | ADP        | <sup>41</sup> |
| Peptide pp*                                            | 2.2                 | Yes      | +4         | ATP        | <sup>41</sup> |
| human telomere repeat binding factor 1 (hTRF1) 377-430 | 1.4±0.2             | Yes      | +10        | ADP        | <sup>42</sup> |
| human telomere repeat binding factor 1 (hTRF1) 377-430 | 18±3                | Yes      | +10        | ATP        | <sup>42</sup> |
| Islet amyloid polypeptide ( <i>H. sapiens</i> )        | ~pM                 | No       | +2         | apo        | <sup>35</sup> |
| σ <sup>32</sup> peptide (Q132-Q144) ( <i>E. coli</i> ) | 0.078               | Yes      | +5         | apo        | <sup>43</sup> |
| σ <sup>32</sup> ( <i>E. coli</i> )                     | 5                   | Yes      | -6         | apo        | <sup>44</sup> |

593 **Supplemental Table 2. Compilation of representative DnaK dissociation constants towards client**  
594 **proteins.** \*CALLQSRLLLSAPRRRAAATARA, derivative of chicken mitochondrial aspartate aminotransferase  
595 signal sequence.

596

597

598

599

600

601 **References**

- 602 1. Rosenzweig, R., Nillegoda, N. B., Mayer, M. P. & Bukau, B. The Hsp70 chaperone network. *Nat. Rev.*  
603 *Mol. Cell Biol.* **20**, 665–680 (2019).
- 604 2. Mayer, M. P. & Gierasch, L. M. Recent advances in the structural and mechanistic aspects of Hsp70  
605 molecular chaperones. *J. Biol. Chem.* **294**, 2085–2097 (2019).
- 606 3. Mayer, M. P. & Bukau, B. Hsp70 chaperones: Cellular functions and molecular mechanism. *Cell. Mol.*  
607 *Life Sci.* **62**, 670–684 (2005).
- 608 4. Imamoglu, R., Balchin, D., Hayer-Hartl, M. & Hartl, F. U. Bacterial Hsp70 resolves misfolded states  
609 and accelerates productive folding of a multi-domain protein. *Nat. Commun.* **11**, 365 (2020).
- 610 5. Yang, J., Nune, M., Zong, Y., Zhou, L. & Liu, Q. Close and Allosteric Opening of the Polypeptide-  
611 Binding Site in a Human Hsp70 Chaperone BiP. *Structure* **23**, 2191–2203 (2015).
- 612 6. Bertelsen, E. B., Chang, L., Gestwicki, J. E. & Zuiderweg, E. R. P. Solution conformation of wild-type E.  
613 coli Hsp70 (DnaK) chaperone complexed with ADP and substrate. *Proc. Natl. Acad. Sci. U. S. A.* **106**,  
614 8471–8476 (2009).
- 615 7. Kundel, F. *et al.* Hsp70 Inhibits the Nucleation and Elongation of Tau and Sequesters Tau Aggregates  
616 with High Affinity. *ACS Chem. Biol.* **13**, 636–646 (2018).
- 617 8. Wentink, A. S. *et al.* Molecular dissection of amyloid disaggregation by human HSP70. *Nature* 1–6  
618 (2020) doi:10.1038/s41586-020-2904-6.
- 619 9. Sferruzzi-Perri, A. N., Sandovici, I., Constancia, M. & Fowden, A. L. Placental phenotype and the  
620 insulin-like growth factors: resource allocation to fetal growth. *J. Physiol.* **595**, 5057–5093 (2017).
- 621 10. Jin, Y. *et al.* The ER chaperones BiP and Grp94 regulate the formation of insulin-like growth factor 2  
622 (IGF2) oligomers. *J. Mol. Biol.* 166963 (2021) doi:10.1016/j.jmb.2021.166963.

- 623 11. Duguay, S. J. *et al.* Post-translational Processing of the Insulin-like Growth Factor-2 Precursor. *J. Biol.*  
624 *Chem.* **273**, 18443–18451 (1998).
- 625 12. Qiu, Q., Basak, A., Mbikay, M., Tsang, B. K. & Gruslin, A. Role of pro-IGF-II processing by proprotein  
626 convertase 4 in human placental development. *Proc. Natl. Acad. Sci. U. S. A.* **102**, 11047–11052  
627 (2005).
- 628 13. Basak, A. *et al.* Enzymic characterization in vitro of recombinant proprotein convertase PC4.  
629 *Biochem. J.* **343 Pt 1**, 29–37 (1999).
- 630 14. Cornish, J. *et al.* Preptin, another peptide product of the pancreatic  $\beta$ -cell, is osteogenic in vitro and  
631 in vivo. *Am. J. Physiol.-Endocrinol. Metab.* **292**, E117–E122 (2007).
- 632 15. Cheng, K.-C. *et al.* Characterization of preptin-induced insulin secretion in pancreatic  $\beta$ -cells. *J.*  
633 *Endocrinol.* **215**, 43–49 (2012).
- 634 16. Yang, G. *et al.* Circulating preptin levels in normal, impaired glucose tolerance, and type 2 diabetic  
635 subjects. *Ann. Med.* **41**, 52–56 (2009).
- 636 17. Valenzano, K. J., Heath-Monnig, E., Tollefsen, S. E., Lake, M. & Lobel, P. Biophysical and Biological  
637 Properties of Naturally Occurring High Molecular Weight Insulin-like Growth Factor II Variants. *J.*  
638 *Biol. Chem.* **272**, 4804–4813 (1997).
- 639 18. UCSF Chimera—A visualization system for exploratory research and analysis - Pettersen - 2004 -  
640 Journal of Computational Chemistry - Wiley Online Library.  
641 <https://onlinelibrary.wiley.com/doi/abs/10.1002/jcc.20084>.
- 642 19. Klimstra, W. B., Heidner, H. W. & Johnston, R. E. The Furin Protease Cleavage Recognition Sequence  
643 of Sindbis Virus PE2 Can Mediate Virion Attachment to Cell Surface Heparan Sulfate. *J. Virol.* **73**,  
644 6299–6306 (1999).
- 645 20. Xue, B., Dunbrack, R. L., Williams, R. W., Dunker, A. K. & Uversky, V. N. PONDR-FIT: A Meta-Predictor  
646 of Intrinsically Disordered Amino Acids. *Biochim. Biophys. Acta* **1804**, 996–1010 (2010).



- 647 21. Marcinowski, M. *et al.* Substrate discrimination of the chaperone BiP by autonomous and  
648 cochaperone-regulated conformational transitions. *Nat. Struct. Mol. Biol.* **18**, 150–158 (2011).
- 649 22. Rosam, M. *et al.* Bap (Sil1) regulates the molecular chaperone BiP by coupling release of nucleotide  
650 and substrate. *Nat. Struct. Mol. Biol.* **25**, 90–100 (2018).
- 651 23. Banerjee, R., Jayaraj, G. G., Peter, J. J., Kumar, V. & Mapa, K. Monitoring conformational  
652 heterogeneity of the lid of DnaK substrate-binding domain during its chaperone cycle. *FEBS J.* **283**,  
653 2853–2868 (2016).
- 654 24. Liu, S. & Street, T. O. 5'-N-ethylcarboxamidoadenosine is not a paralog-specific Hsp90 inhibitor.  
655 *Protein Sci.* **25**, 2209–2215 (2016).
- 656 25. Takeda, S. & McKay, D. B. Kinetics of Peptide Binding to the Bovine 70 kDa Heat Shock Cognate  
657 Protein, a Molecular Chaperone. *Biochemistry* **35**, 4636–4644 (1996).
- 658 26. Greene, L. E., Zinner, R., Naficy, S. & Eisenberg, E. Effect of Nucleotide on the Binding of Peptides to  
659 70-kDa Heat Shock Protein (\*). *J. Biol. Chem.* **270**, 2967–2973 (1995).
- 660 27. Schneider, M. *et al.* BiPPred: Combined sequence- and structure-based prediction of peptide  
661 binding to the Hsp70 chaperone BiP. *Proteins Struct. Funct. Bioinforma.* **84**, 1390–1407 (2016).
- 662 28. Phillips, R. B., Kondev, Jane, Theriot, J., Garcia, H. G. & Orme, N. *Physical biology of the cell.* (2013).
- 663 29. Kegel, W. K. & Schoot, P. van der. Competing Hydrophobic and Screened-Coulomb Interactions in  
664 Hepatitis B Virus Capsid Assembly. *Biophys. J.* **86**, 3905–3913 (2004).
- 665 30. Muchowski, P. J. & Wacker, J. L. Modulation of neurodegeneration by molecular chaperones. *Nat.*  
666 *Rev. Neurosci.* **6**, 11–22 (2005).
- 667 31. Feige, M. J. *et al.* An unfolded CH1 domain controls the assembly and secretion of IgG antibodies.  
668 *Mol. Cell* **34**, 569–579 (2009).
- 669 32. Buchanan, C. M., Peng, Z., Cefre, A. & Sarojini, V. Preptin Analogues: Chemical Synthesis, Secondary  
670 Structure and Biological Studies. *Chem. Biol. Drug Des.* **82**, 429–437 (2013).

- 671 33. Jiang, Y., Fu, H., Springer, T. A. & Wong, W. P. Electrostatic steering enables flow-activated von  
672 Willebrand Factor to bind platelet glycoprotein, revealed by single-molecule stretching and imaging.  
673 *J. Mol. Biol.* **431**, 1380–1396 (2019).
- 674 34. Flechtner, J. B. *et al.* High-Affinity Interactions between Peptides and Heat Shock Protein 70  
675 Augment CD8+ T Lymphocyte Immune Responses. *J. Immunol.* **177**, 1017–1027 (2006).
- 676 35. Chilukoti, N. *et al.* Hsp70 Inhibits Aggregation of IAPP by Binding to the Heterogeneous  
677 Prenucleation Oligomers. *Biophys. J.* **120**, 476–488 (2021).
- 678 36. Sarkar, M., Kuret, J. & Lee, G. Two motifs within the tau microtubule-binding domain mediate its  
679 association with the hsc70 molecular chaperone. *J. Neurosci. Res.* **86**, 2763–2773 (2008).
- 680 37. Kopp, M. C., Larburu, N., Durairaj, V., Adams, C. J. & Ali, M. M. UPR proteins IRE1 and PERK switch  
681 BiP from chaperone to ER stress sensor. *Nat. Struct. Mol. Biol.* **26**, 1053–1062 (2019).
- 682 38. Stetefeld, J., McKenna, S. A. & Patel, T. R. Dynamic light scattering: a practical guide and applications  
683 in biomedical sciences. *Biophys. Rev.* **8**, 409–427 (2016).
- 684 39. Yang, J. *et al.* Conformation transitions of the polypeptide-binding pocket support an active  
685 substrate release from Hsp70s. *Nat. Commun.* **8**, 1201 (2017).
- 686 40. Maeda, H. *et al.* Biological Heterogeneity of the Peptide-binding Motif of the 70-kDa Heat Shock  
687 Protein by Surface Plasmon Resonance Analysis\*. *J. Biol. Chem.* **282**, 26956–26962 (2007).
- 688 41. Siegenthaler, R. K. & Christen, P. Tuning of DnaK Chaperone Action by Nonnative Protein Sensor  
689 DnaJ and Thermosensor GrpE\*. *J. Biol. Chem.* **281**, 34448–34456 (2006).
- 690 42. Sekhar, A., Rosenzweig, R., Bouvignies, G. & Kay, L. E. Mapping the conformation of a client protein  
691 through the Hsp70 functional cycle. *Proc. Natl. Acad. Sci.* **112**, 10395–10400 (2015).
- 692 43. McCarty, J. S. *et al.* Regulatory Region C of the E. coli Heat Shock Transcription Factor,  $\sigma$ 32,  
693 Constitutes a DnaK Binding Site and is Conserved Among Eubacteria. *J. Mol. Biol.* **256**, 829–837  
694 (1996).

695 44. Gamer, J. *et al.* A cycle of binding and release of the DnaK, DnaJ and GrpE chaperones regulates  
696 activity of the Escherichia coli heat shock transcription factor sigma32. *EMBO J.* **15**, 607–617 (1996).  
697
